# Supplementary material for: Social cognition and social functioning in people with borderline personality disorder and their first-degree relatives
Source: PeerJ. 2020 Oct 30;8:e10212. doi: 10.7717/peerj.10212 (PMC7605216; doi:10.7717/peerj.10212)
Supplement: Supplemental Information 1 [file peerj-08-10212-s001.xlsx]

## Sheet: Sheet1
ID	GROUP	SEX	AGE	MARITAL_STATUS	EDUCATIONAL_LEVEL	OCCUPATION	HOUSEHOLD_COMPOSITION	Correct	Tom	LessTom	NoTom	SFS	SFS_cat	SFS_FAMILY_RELATIONSHIPS	SFS_SOCIAL_ENGAGEMENT_WITHDRAWAL	SFS_INTERPERSONAL BEHAVIOR	SFS_INDEPENDENCE_PERFORMANCE	SFS_INDEPENDENCE_COMPETENCE	SFS_RECREATION	SFS_PROSOCIAL_ACTIVITIES	SFS_EMPLOYMENT/OCCUPATION
01CON	0	1	28	1	1	3	0	32	7	4	2	115.85	2	9	13	9	33	39	23	26	9
01FAM	1	1	59	2	1	2	0	33	5	6	1	108.42	2	10	12	5	36	39	23	7	9
01TLP	2	1	29	1	1	0	0	28	7	6	4	96.28	1	11	13	9	36	39	15	16	10
02CON	0	1	20	0	0	0	2	30	4	8	3	118.86	2	8	13	7	39	39	32	25	10
02FAM	1	0	62	1	2	0	0	23	14	4	4	113.42	2	9	13	9	28	39	23	20	9
02TLP	2	1	20	1	0	3	1	26	12	1	6	111.28	2	9	11	9	26	35	23	27	10
03CON	0	1	44	2	1	0	0	37	3	4	1	113.42	2	11	14	9	39	39	12	19	9
03FAM	1	1	63	1	0	0	0	26	6	8	5	115.57	2	10	15	9	33	39	23	14	10
03TLP	2	1	43	1	1	0	0	27	13	4	1	98.14	1	6	8	8	19	34	9	11	10
04CON	0	1	44	1	0	0	0	24	11	4	6	108.28	2	11	12	6	35	39	17	9	10
04FAM	1	1	44	1	1	0	1	27	8	7	3	120.28	2	10	13	9	36	39	26	35	10
04TLP	2	1	43	0	0	1	1	29	9	6	1	101.14	1	4	9	7	30	34	25	11	2
05CON	0	1	18	0	1	1	1	31	6	5	3	104.85	1	9	7	8	26	39	16	15	10
05FAM	1	0	17	0	0	3	1	33	8	2	2	113.71	2	10	9	8	21	36	9	11	10
05TLP	2	1	18	1	0	0	2	33	6	3	3	97.42	1	8	5	6	26	30	18	15	10
06CON	0	1	36	1	2	0	0	35	3	5	2	115.85	2	12	14	9	39	39	20	15	10
06FAM	1	0	61	1	2	3	0	30	7	6	2	118.42	2	5	15	9	31	39	24	34	8
06TLP	2	1	36	1	2	2	1	31	7	7	0	101.42	1	4	6	8	18	39	15	23	4
07CON	0	0	34	0	1	0	1	27	8	6	4	119.29	2	11	14	9	33	39	21	28	10
07TLP	2	0	33	1	1	1	0	29	8	4	4	84.14	0	9	4	4	8	35	9	6	2
08CON	0	1	41	1	1	0	0	29	7	7	2	125	2	11	14	9	37	39	35	34	10
08FAM	1	1	65	2	0	0	2	20	13	10	2	104.85	1	11	10	8	27	39	5	16	10
08TLP	2	1	41	0	1	3	2	22	11	7	5	101.28	1	6	7	9	21	38	21	18	3
09CON	0	1	24	0	1	3	1	29	7	6	3	117.71	2	12	13	9	33	39	21	35	10
09FAM	1	1	56	1	2	0	0	35	3	5	2	122.71	2	8	15	8	36	39	40	37	9
09TLP	2	1	24	1	1	1	1	27	7	6	5	108.85	2	10	14	9	26	39	21	16	3
10CON	0	1	46	1	0	0	0	33	3	5	4	127.57	2	10	15	9	39	39	37	53	10
10TLP	2	1	46	2	0	3	0	31	4	6	4	94.57	0	11	7	8	25	35	13	11	0
11CON	0	1	58	2	0	0	1	23	8	12	2	108.14	2	4	12	7	39	39	13	5	10
11TLP	2	1	57	2	0	3	2	22	13	5	5	95.28	1	3	6	8	30	36	16	4	0
12CON	0	1	39	1	1	0	0	38	5	2	0	121.14	2	11	14	9	39	39	33	24	9
12FAM	1	1	62	1	0	1	0	21	3	15	6	112.28	2	11	14	8	38	39	18	8	10
12TLP	2	1	39	1	1	0	0	24	13	3	5	108.42	2	7	13	8	29	39	12	16	9
13CON	0	1	22	0	1	3	0	37	4	4	0	109.14	2	11	13	8	24	37	16	21	10
13FAM	1	1	56	1	0	0	0	34	3	5	3	117.14	2	9	14	9	38	39	25	16	10
13TLP	2	1	22	1	1	1	0	38	0	3	4	111.28	2	10	13	9	25	39	18	23	8
14CON	0	1	37	1	2	0	0	30	5	5	5	120.14	2	9	14	9	36	39	28	29	10
14FAM	1	1	54	2	1	0	2	32	8	4	1	122.85	2	9	15	9	39	39	31	24	10
14TLP	2	1	37	1	2	0	0	34	6	5	0	110.71	2	9	12	7	37	39	15	18	10
15CON	0	1	27	1	1	2	0	25	15	3	2	113.14	2	10	13	9	32	37	24	13	10
15FAM	1	0	61	1	1	1	0	29	9	5	2	117.71	2	9	14	9	32	37	27	34	4
15TLP	2	1	27	0	1	0	1	30	6	6	3	108.74	2	6	12	9	30	36	17	10	9
16CON	0	0	25	1	0	0	0	33	6	5	1	115.28	2	11	14	9	31	39	17	28	10
16FAM	1	1	65	1	0	2	0	26	6	8	5	114.43	2	12	14	9	39	39	18	14	9
16TLP	2	0	25	0	0	1	1	26	8	7	4	86.28	0	10	6	6	13	32	11	9	0
17CON	0	1	52	1	1	0	0	31	6	5	3	117.43	2	11	12	8	39	39	27	24	10
17TLP	2	1	52	1	1	1	0	29	5	7	4	116.42	2	11	13	8	35	39	29	24	5
18CON	0	1	47	2	1	1	0	24	6	10	5	101	1	10	9	9	37	39	10	3	2
18FAM	1	0	22	0	1	1	1	30	11	3	1	112	2	10	12	9	26	37	23	28	8
18TLP	2	1	47	1	1	1	0	34	6	3	2	90.57	0	5	9	7	18	30	11	12	0
19CON	0	1	25	1	2	0	0	39	0	5	1	116.43	2	10	13	7	35	39	20	27	10
19FAM	1	1	52	1	1	0	0	33	2	9	1	118.57	2	10	14	9	39	39	26	18	10
19TLP	2	1	25	0	2	3	1	37	5	2	1	103.28	1	5	7	9	24	39	18	8	8
57CON	0	1	34	1	1	0	0	36	7	1	1	118.43	2	11	14	9	37	39	24	24	10
20FAM	1	0	65	1	0	2	0	15	16	9	5	108.42	2	11	13	7	21	36	23	21	9
20TLP	2	1	35	0	1	1	2	21	10	6	8	105.42	1	10	7	5	36	37	25	16	8
21CON	0	1	33	1	0	1	0	26	9	7	3	108.43	2	11	12	7	30	39	21	20	5
21FAM	1	0	16	0	0	3	0	21	12	7	5	83.42	0	7	6	8	17	35	6	7	10
21TLP	2	1	32	0	0	2	0	17	12	10	6	100.85	1	7	10	7	25	39	17	15	2
22CON	0	1	40	1	1	0	0	31	6	7	1	122.14	2	8	14	9	39	39	31	31	10
22TLP	2	1	40	0	1	2	0	26	9	8	2	92.57	0	8	3	1	17	29	16	2	0
23CON	0	1	46	1	1	0	0	31	5	6	3	114.71	2	11	14	9	36	39	18	16	10
23TLP	2	1	46	0	1	1	2	32	5	8	0	79.14	0	2	5	8	16	39	8	0	2
24CON	0	0	44	1	1	0	0	25	12	6	2	111.85	2	11	14	9	31	39	20	4	10
24TLP	2	0	44	0	1	2	1	26	9	7	3	71.42	0	8	5	4	24	31	7	2	0
25FAM	1	1	44	2	0	1	0	27	8	6	4	117.42	2	9	15	9	37	39	26	17	8
25TLP	2	1	23	0	0	1	1	30	10	4	1	96.85	1	8	5	4	28	36	15	15	8
26TLP	2	1	28	1	0	1	0	28	8	6	3	116.14	2	9	14	8	31	39	28	25	8
27CON	0	1	43	2	0	0	0	30	2	9	4	110.29	2	12	12	8	37	39	14	12	10
27FAM	1	1	64	1	0	2	0	28	6	7	4	114.57	2	12	14	9	34	39	23	14	9
27TLP	2	1	43	1	0	1	0	22	12	3	8	88.28	0	9	8	8	24	25	12	6	1
28CON	0	1	20	0	1	3	1	32	4	5	4	105.29	1	11	13	9	24	37	13	23	3
28TLP	2	1	20	1	1	3	0	33	11	1	0	104.57	1	3	10	7	34	31	21	27	4
29CON	0	1	25	0	1	3	1	34	2	7	2	111.43	2	10	13	8	24	38	18	28	10
29TLP	2	1	25	0	1	0	1	29	10	5	1	115.57	2	7	12	9	39	39	20	24	9
30TLP	2	1	67	2	1	2	0	28	8	6	3	71	0	6	3	3	14	31	5	2	9
31CON	0	1	25	1	1	3	1	36	1	5	3	113.71	2	10	14	8	32	39	18	22	10
31FAM	1	1	26	1	1	3	0	31	6	4	4	112	2	8	13	9	31	39	15	21	9
31TLP	2	1	25	0	1	0	1	29	9	6	1	105.14	1	4	9	7	34	35	14	20	9
32CON	0	1	21	0	0	0	2	29	8	7	1	111	2	11	12	8	35	37	18	15	10
32FAM	1	0	46	1	0	0	0	33	4	7	1	114.71	2	9	13	8	29	37	28	23	10
32TLP	2	1	21	0	0	1	1	26	7	8	4	100.43	1	8	11	5	25	35	15	24	4
35CON	0	1	32	1	1	0	0	37	2	3	3	112.85	2	11	12	7	33	39	31	27	9
48CON	0	1	30	1	0	0	0	28	4	9	4	117.14	2	11	14	9	34	39	23	28	9
33TLP	2	1	33	0	1	2	2	35	7	2	1	98.14	1	6	9	7	30	35	16	8	2
34CON	0	1	37	1	2	0	0	33	6	5	1	119	2	11	14	9	39	39	23	29	10
34FAM	1	0	65	1	1	2	0	30	6	3	4	103.29	1	12	14	9	36	39	25	16	3
34TLP	2	1	37	1	2	0	0	26	8	4	7	116.86	2	6	14	9	37	37	23	27	9
33CON	0	1	33	1	1	0	0	39	2	3	1	120.14	2	12	14	9	36	39	28	29	10
35TLP	2	1	32	1	1	1	0	23	10	9	3	118.14	2	11	14	9	35	39	24	31	8
36FAM	1	1	49	2	2	0	0	34	5	6	0	117.29	2	8	12	9	36	39	20	34	10
36TLP	2	1	18	1	0	3	1	33	4	6	2	118.71	2	10	13	7	36	39	34	27	10
38TLP	2	1	36	0	1	0	1	18	10	11	6	113.71	2	6	10	9	37	39	26	16	9
39CON	0	0	34	0	0	0	0	34	5	3	3	116.29	2	10	13	9	26	39	25	30	10
39TLP	2	0	35	0	0	0	2	23	17	3	2	116.71	2	11	14	8	36	39	28	41	3
40TLP	2	1	41	0	2	1	1	25	7	8	5	119.71	2	9	13	9	39	39	27	36	6
40CON	0	1	41	1	2	0	0	36	3	4	0	117.26	2	10	14	9	39	39	22	18	10
41TLP	2	0	31	1	1	0	2	30	8	4	3	92.86	0	1	3	1	33	39	16	9	9
41CON	0	0	31	1	1	0	0	25	10	5	5	112.71	2	13	15	9	34	37	11	22	10
37TLP	2	1	55	2	0	2	0	27	7	11	0	101.43	1	5	12	5	19	39	18	30	0
50CON	0	1	25	0	0	1	0	25	5	11	4	110.14	2	9	13	8	35	39	17	17	6
56CON	0	1	19	0	0	3	1	31	5	7	2	108.71	2	8	12	9	23	35	18	21	10
37CON	0	1	54	1	0	0	0	31	5	7	2	118.86	2	8	12	9	39	39	39	17	10
30CON	0	1	66	1	1	2	0	35	6	4	0	118.71	2	9	13	9	38	39	33	19	9
25CON	0	1	23	0	0	0	0	26	8	6	5	117.43	2	4	14	8	39	39	24	26	10
42TLP	2	1	42	2	2	0	0	33	4	6	2	119.86	2	3	13	9	39	39	36	19	10
42CON	0	1	42	0	2	0	2	29	9	5	2	111.43	2	10	10	9	35	39	14	19	10
43TLP	2	1	21	1	1	3	0	30	11	3	1	110.43	2	6	11	9	28	39	16	20	10
43CON	0	1	21	1	1	3	1	31	10	4	0	118.85	2	11	12	8	33	39	28	38	10
43FAM	1	0	15	0	0	3	1	19	13	8	5	93.29	0	6	8	6	16	32	4	7	10
44TLP	2	1	38	0	1	0	1	26	1	16	2	112.71	2	7	13	6	29	36	22	35	10
44FAM	1	1	69	1	0	2	0	12	12	12	1	115.42	2	11	14	9	39	39	18	19	9
44CON	0	1	38	0	1	1	1	32	2	8	3	106.85	2	9	11	8	27	39	18	17	6
45FAM	1	1	54	2	0	2	0	28	11	4	2	99.14	1	9	9	9	21	39	16	4	2
38CON	0	1	36	1	1	2	0	34	4	6	1	112.86	2	11	13	9	29	39	21	18	9
45TLP	2	1	34	1	1	1	0	27	9	4	5	86.29	0	9	10	5	22	29	15	4	0
45CON	0	1	34	1	1	3	0	32	5	3	5	107.42	2	9	10	7	31	39	19	10	10
46TLP	2	1	25	1	2	3	0	31	7	3	4	106.71	2	9	11	6	28	39	19	19	10
47TLP	2	1	33	2	1	1	2	36	4	4	1	100.43	1	7	8	7	28	31	21	10	8
47FAM	1	1	60	2	0	2	2	27	6	7	5	106	1	7	9	7	35	39	18	6	9
48TLP	2	1	30	0	0	1	1	32	8	4	1	95.14	1	6	2	8	27	39	16	6	3
49TLP	2	1	30	0	1	0	2	30	5	7	3	106.71	2	10	8	9	35	38	16	6	10
50TLP	2	1	25	0	0	1	0	23	13	7	1	100.14	1	6	10	5	25	38	10	17	7
51TLP	2	1	19	1	1	3	0	27	11	5	2	107.29	2	5	11	8	33	35	15	15	10
52TLP	2	1	21	1	1	3	1	25	11	4	5	108.71	2	4	8	7	33	36	18	32	10
52CON	0	1	21	0	1	3	1	33	7	3	2	117.71	2	11	14	9	33	39	16	39	10
53TLP	2	1	32	1	1	3	1	33	3	6	3	111.29	2	10	13	9	19	36	25	27	4
53FAM	1	1	67	1	2	2	0	29	4	9	3	116.14	2	10	12	9	39	39	22	23	9
51CON	0	1	19	0	1	0	1	27	9	5	4	113.71	2	9	12	9	31	38	20	28	9
47CON	0	1	33	1	1	0	0	36	7	2	0	118.14	2	12	13	9	39	39	26	23	9
54TLP	2	1	44	0	1	0	2	30	7	6	2	107	2	7	8	7	32	39	24	7	10
54FAM	1	0	70	1	0	2	0	24	10	6	5	118	2	8	14	9	31	39	29	23	9
55TLP	2	1	27	0	0	1	1	16	3	14	12	102.29	1	11	10	7	32	39	14	7	5
55FAM	1	1	58	1	0	0	0	21	15	7	2	119.57	2	6	14	8	39	39	27	28	10
55FAM1	1	0	61	1	0	0	0	31	9	4	1	116	2	8	12	9	30	38	26	29	10
46CON	0	1	25	0	2	0	2	30	8	4	3	117	2	12	15	9	37	39	19	21	10
53CON	0	1	32	1	1	3	0	39	3	3	0	102.86	1	10	11	8	28	39	15	11	3
56TLP	2	1	19	0	0	3	1	40	3	2	0	109	2	9	10	9	27	35	17	28	10
36CON	0	1	18	0	0	3	1	30	7	6	2	105.71	1	9	13	8	21	34	11	23	10
55CON	0	1	27	1	0	0	0	26	10	4	5	119.71	2	11	15	9	39	39	24	24	10
54CON	0	1	44	1	1	0	0	31	6	5	3	119.71	2	11	13	9	39	39	25	31	10
26CON	0	1	28	1	0	0	0	23	8	11	3	115	2	8	12	9	32	39	24	24	10
49CON	0	1	29	1	1	0	0	29	7	7	2	120.86	2	12	12	9	37	39	28	38	10
20CON	0	1	35	1	1	0	0	26	6	9	4	112.57	2	10	14	8	28	38	21	18	10
57TLP	2	1	34	0	1	2	1	27	9	7	2	82.42	0	11	8	5	16	24	8	4	2
57FAM	1	1	66	2	0	2	0	33	5	5	2	114.85	2	12	9	9	33	39	32	20	9
